# Supplementary material for: Placental transcriptional signatures associated with cerebral white matter damage in the neonate
Source: Front Neurosci. 2022 Oct 28;16:1017953. doi: 10.3389/fnins.2022.1017953 (PMC9650394; doi:10.3389/fnins.2022.1017953)
Supplement: Supplementary file 5 [file Table_2.XLSX]

## Sheet: Diseases and Disorders
Supplemental Table 2a. Diseases and disorders (n=25) enriched among the 244 WMD-associated genes as indicated by echolucency (ELX) and/or ventriculomegaly (VLM).
Category	lower p-value (elx)	upper p-value (elx)	avj p-value (elx)	Fisher's neg log(p-value)	Molecules (elx)	Molecule Total	lower p-value (vlm)	upper p-value (vlm)	avj p-value (vlm)	Fisher's neg log(p-value)	Molecules (vlm)	Molecule Total
Cancer	3.27e-12	0.0115	0.0115	11.5	ADAMTSL3,ADAMTSL4,ADM,AKAP10,AKAP11,AKAP9,ANAPC4,ANKLE2,ANP32E,AP1G1,ARHGAP4,ARHGEF12,ARID1A,ARL14EP,ASH1L,ATM,ATP1A1,ATP5ME,ATP6V1D,ATRX,ATXN1L,BCYRN1,BDP1,BRCA2,BRMS1L,BTBD7,C11orf58,CAMSAP2,CCP110,CCT3,CDC5L,CDV3,CENPC,CENPE,CEP112,CEP126,CEP295NL,CHD2,CHFR,CHMP3,CKAP5,CNBP,COL27A1,COLGALT1,COMMD2,CTDSPL2,CTTNBP2NL,CYSLTR1,DAP,DBI,DDAH2,DDX17,DGKZ,DHX9,DIXDC1,DNM1L,DPY19L4,DSE,DSP,DST,DSTYK,EC…	241	3.27e-12	0.0115	0.0115	11.5	ADAMTSL3,ADAMTSL4,ADM,AKAP10,AKAP11,AKAP9,ANAPC4,ANKLE2,ANP32E,AP1G1,ARHGAP4,ARHGEF12,ARID1A,ARL14EP,ASH1L,ATM,ATP1A1,ATP5ME,ATP6V1D,ATRX,ATXN1L,BCYRN1,BDP1,BRCA2,BRMS1L,BTBD7,C11orf58,CAMSAP2,CCP110,CCT3,CDC5L,CDV3,CENPC,CENPE,CEP112,CEP126,CEP295NL,CHD2,CHFR,CHMP3,CKAP5,CNBP,COL27A1,COLGALT1,COMMD2,CTDSPL2,CTTNBP2NL,CYSLTR1,DAP,DBI,DDAH2,DDX17,DGKZ,DHX9,DIXDC1,DNM1L,DPY19L4,DSE,DSP,DST,DSTYK,EC…	241
Organismal Injury and Abnormalities	3.27e-12	0.0115	0.00575	11.5	ADAMTSL3,ADAMTSL4,ADM,AKAP10,AKAP11,AKAP9,ANAPC4,ANKLE2,ANP32E,AP1G1,ARHGAP4,ARHGEF12,ARID1A,ARL14EP,ASH1L,ATM,ATP1A1,ATP5ME,ATP6V1D,ATRX,ATXN1L,BCYRN1,BDP1,BRCA2,BRMS1L,BTBD7,C11orf58,CAMSAP2,CCP110,CCT3,CDC5L,CDV3,CENPC,CENPE,CEP112,CEP126,CEP295NL,CHD2,CHFR,CHMP3,CKAP5,CNBP,COL27A1,COLGALT1,COMMD2,CTDSPL2,CTTNBP2NL,CYSLTR1,DAP,DBI,DDAH2,DDX17,DGKZ,DHX9,DIXDC1,DNM1L,DPY19L4,DSE,DSP,DST,DSTYK,EC…	241	3.27e-12	0.0115	0.00575	11.5	ADAMTSL3,ADAMTSL4,ADM,AKAP10,AKAP11,AKAP9,ANAPC4,ANKLE2,ANP32E,AP1G1,ARHGAP4,ARHGEF12,ARID1A,ARL14EP,ASH1L,ATM,ATP1A1,ATP5ME,ATP6V1D,ATRX,ATXN1L,BCYRN1,BDP1,BRCA2,BRMS1L,BTBD7,C11orf58,CAMSAP2,CCP110,CCT3,CDC5L,CDV3,CENPC,CENPE,CEP112,CEP126,CEP295NL,CHD2,CHFR,CHMP3,CKAP5,CNBP,COL27A1,COLGALT1,COMMD2,CTDSPL2,CTTNBP2NL,CYSLTR1,DAP,DBI,DDAH2,DDX17,DGKZ,DHX9,DIXDC1,DNM1L,DPY19L4,DSE,DSP,DST,DSTYK,EC…	241
Endocrine System Disorders	4.97e-12	0.0115	0.00575	11.3	ADAMTSL3,ADAMTSL4,AKAP10,AKAP11,AKAP9,ANAPC4,ANKLE2,ANP32E,AP1G1,ARHGAP4,ARHGEF12,ARID1A,ARL14EP,ASH1L,ATM,ATP1A1,ATP5ME,ATP6V1D,ATRX,BDP1,BRCA2,BRMS1L,BTBD7,C11orf58,CAMSAP2,CCP110,CDC5L,CDV3,CENPC,CENPE,CEP112,CEP126,CEP295NL,CHD2,CHFR,CKAP5,COL27A1,COLGALT1,CTDSPL2,CTTNBP2NL,CYSLTR1,DAP,DDAH2,DDX17,DGKZ,DHX9,DIXDC1,DNM1L,DPY19L4,DSE,DSP,DST,DSTYK,ECPAS,EHD1,EIF3I,ENO1,EP400,ERCC5,ERICH1,ESCO1,…	214	4.97e-12	0.0115	0.00575	11.3	ADAMTSL3,ADAMTSL4,AKAP10,AKAP11,AKAP9,ANAPC4,ANKLE2,ANP32E,AP1G1,ARHGAP4,ARHGEF12,ARID1A,ARL14EP,ASH1L,ATM,ATP1A1,ATP5ME,ATP6V1D,ATRX,BDP1,BRCA2,BRMS1L,BTBD7,C11orf58,CAMSAP2,CCP110,CDC5L,CDV3,CENPC,CENPE,CEP112,CEP126,CEP295NL,CHD2,CHFR,CKAP5,COL27A1,COLGALT1,CTDSPL2,CTTNBP2NL,CYSLTR1,DAP,DDAH2,DDX17,DGKZ,DHX9,DIXDC1,DNM1L,DPY19L4,DSE,DSP,DST,DSTYK,ECPAS,EHD1,EIF3I,ENO1,EP400,ERCC5,ERICH1,ESCO1,…	214
Renal and Urological Disease	4.83e-09	0.0115	0.00575	8.4	ADAMTSL3,ADAMTSL4,ADM,AKAP11,AKAP9,ANAPC4,ANKLE2,ARID1A,ASH1L,ATM,ATRX,BDP1,BRCA2,BTBD7,CCT3,CENPC,CENPE,COL27A1,COLGALT1,COMMD2,DGKZ,DHX9,DNM1L,DSP,DST,DSTYK,EIF3I,EP400,ERCC5,FLNA,GGA3,GNAI1,GNPTAB,H1-2,IL1R1,ING5,ITGA1,ITSN2,KIAA0319L,KIF1B,MACF1,MAN2A1,MAP3K8,MAPKAPK2,MBD1,MCL1,METAP2,MLLT10,MPHOSPH8,MRE11,MTAP,MTUS1,OPTN,P3H4,PAFAH1B1,PBX1,PIK3C2A,PIP4K2A,PPP1R15A,PRDX1,PTPN11,RAD50,RALA,RAL…	93	4.83e-09	0.0115	0.00575	8.4	ADAMTSL3,ADAMTSL4,ADM,AKAP11,AKAP9,ANAPC4,ANKLE2,ARID1A,ASH1L,ATM,ATRX,BDP1,BRCA2,BTBD7,CCT3,CENPC,CENPE,COL27A1,COLGALT1,COMMD2,DGKZ,DHX9,DNM1L,DSP,DST,DSTYK,EIF3I,EP400,ERCC5,FLNA,GGA3,GNAI1,GNPTAB,H1-2,IL1R1,ING5,ITGA1,ITSN2,KIAA0319L,KIF1B,MACF1,MAN2A1,MAP3K8,MAPKAPK2,MBD1,MCL1,METAP2,MLLT10,MPHOSPH8,MRE11,MTAP,MTUS1,OPTN,P3H4,PAFAH1B1,PBX1,PIK3C2A,PIP4K2A,PPP1R15A,PRDX1,PTPN11,RAD50,RALA,RAL…	93
Neurological Disease	2.59e-08	0.0115	0.00575001	7.6	ADAMTSL3,ADAMTSL4,ADM,AKAP11,AKAP9,ANAPC4,ANKLE2,ANP32E,ARHGAP4,ARID1A,ARL14EP,ASH1L,ATM,ATP1A1,ATP5ME,ATRX,BDP1,BRCA2,BTBD7,CAMSAP2,CCP110,CCT3,CDC5L,CENPC,CENPE,CEP112,CHD2,CHFR,CKAP5,COL27A1,COLGALT1,CYSLTR1,DBI,DDX17,DGKZ,DHX9,DIXDC1,DNM1L,DPY19L4,DSE,DSP,DST,DSTYK,ECPAS,EHD1,EP400,ERCC5,ERICH1,ESCO1,FAXDC2,FLNA,FNDC3B,GBP4,GNAI1,GNB4,GNL3L,GNPTAB,GTDC1,GTPBP4,H1-2,HSPA5,IL1R1,IMMT,INPP5D,ITG…	168	2.59e-08	0.0115	0.00575001	7.6	ADAMTSL3,ADAMTSL4,ADM,AKAP11,AKAP9,ANAPC4,ANKLE2,ANP32E,ARHGAP4,ARID1A,ARL14EP,ASH1L,ATM,ATP1A1,ATP5ME,ATRX,BDP1,BRCA2,BTBD7,CAMSAP2,CCP110,CCT3,CDC5L,CENPC,CENPE,CEP112,CHD2,CHFR,CKAP5,COL27A1,COLGALT1,CYSLTR1,DBI,DDX17,DGKZ,DHX9,DIXDC1,DNM1L,DPY19L4,DSE,DSP,DST,DSTYK,ECPAS,EHD1,EP400,ERCC5,ERICH1,ESCO1,FAXDC2,FLNA,FNDC3B,GBP4,GNAI1,GNB4,GNL3L,GNPTAB,GTDC1,GTPBP4,H1-2,HSPA5,IL1R1,IMMT,INPP5D,ITG…	168
Gastrointestinal Disease	4.33e-07	0.0115	0.00575022	6.4	ADAMTSL3,ADAMTSL4,ADM,AKAP11,AKAP9,ANKLE2,ANP32E,AP1G1,ARHGAP4,ARHGEF12,ARID1A,ARL14EP,ASH1L,ATM,ATP1A1,ATP5ME,ATP6V1D,ATRX,ATXN1L,BCYRN1,BDP1,BRCA2,BRMS1L,BTBD7,C11orf58,CAMSAP2,CCP110,CDC5L,CDV3,CENPC,CENPE,CEP112,CEP126,CEP295NL,CHD2,CHFR,CKAP5,CNBP,COL27A1,COLGALT1,COMMD2,CTTNBP2NL,CYSLTR1,DBI,DDX17,DGKZ,DHX9,DIXDC1,DNM1L,DPY19L4,DSE,DSP,DST,DSTYK,ECPAS,EHD1,EIF3I,ENO1,EP400,ERCC5,ERICH1,ESCO…	214	4.33e-07	0.0115	0.00575022	6.4	ADAMTSL3,ADAMTSL4,ADM,AKAP11,AKAP9,ANKLE2,ANP32E,AP1G1,ARHGAP4,ARHGEF12,ARID1A,ARL14EP,ASH1L,ATM,ATP1A1,ATP5ME,ATP6V1D,ATRX,ATXN1L,BCYRN1,BDP1,BRCA2,BRMS1L,BTBD7,C11orf58,CAMSAP2,CCP110,CDC5L,CDV3,CENPC,CENPE,CEP112,CEP126,CEP295NL,CHD2,CHFR,CKAP5,CNBP,COL27A1,COLGALT1,COMMD2,CTTNBP2NL,CYSLTR1,DBI,DDX17,DGKZ,DHX9,DIXDC1,DNM1L,DPY19L4,DSE,DSP,DST,DSTYK,ECPAS,EHD1,EIF3I,ENO1,EP400,ERCC5,ERICH1,ESCO…	214
Hepatic System Disease	2.31e-06	0.0115	0.00575115	5.6	ADAMTSL3,ADAMTSL4,AKAP11,AKAP9,ANKLE2,ANP32E,AP1G1,ARHGAP4,ARHGEF12,ARID1A,ASH1L,ATM,ATP1A1,ATP5ME,ATRX,BDP1,BRCA2,BRMS1L,BTBD7,CCP110,CENPC,CENPE,CEP112,CEP126,CEP295NL,CKAP5,COL27A1,CYSLTR1,DBI,DDX17,DHX9,DNM1L,DPY19L4,DSE,DST,ECPAS,EHD1,EIF3I,ENO1,EP400,ERCC5,ERICH1,ESCO1,FAM133B,FLNA,FNDC3B,GBP4,GNAI1,GNL3L,GNPTAB,GTPBP4,HNRNPC,HSPA5,IL1R1,IMMT,ING5,INPP5D,ITGA1,JMY,KIAA0319L,KIF1B,MACF1,MAN2…	136	2.31e-06	0.0115	0.00575115	5.6	ADAMTSL3,ADAMTSL4,AKAP11,AKAP9,ANKLE2,ANP32E,AP1G1,ARHGAP4,ARHGEF12,ARID1A,ASH1L,ATM,ATP1A1,ATP5ME,ATRX,BDP1,BRCA2,BRMS1L,BTBD7,CCP110,CENPC,CENPE,CEP112,CEP126,CEP295NL,CKAP5,COL27A1,CYSLTR1,DBI,DDX17,DHX9,DNM1L,DPY19L4,DSE,DST,ECPAS,EHD1,EIF3I,ENO1,EP400,ERCC5,ERICH1,ESCO1,FAM133B,FLNA,FNDC3B,GBP4,GNAI1,GNL3L,GNPTAB,GTPBP4,HNRNPC,HSPA5,IL1R1,IMMT,ING5,INPP5D,ITGA1,JMY,KIAA0319L,KIF1B,MACF1,MAN2…	136
Developmental Disorder	4.32e-05	0.0115	0.0057716	4.4	ADAMTSL4,ADM,AKAP9,ANKLE2,ARID1A,ARL14EP,ASH1L,ATM,ATP1A1,ATRX,BRCA2,CDC5L,CENPE,CHD2,CNBP,COL27A1,DNM1L,DSE,DSP,DST,DSTYK,ERCC5,FLNA,GNPTAB,IL1R1,KIF1B,LUZP1,MACF1,MCL1,MCM3AP,MRE11,MRPS16,MTAP,PABPN1,PAFAH1B1,PARP14,PBX1,PCYT1A,PEX26,PIK3C2A,PPP1R15B,PTPN11,RALA,RBM8A,RCAN1,RIN2,RPL35A,RPL5,RPS10,RPSA,SASH1,SBDS,SKI,SLC40A1,SMAD4,SPG7,STRA6,TPM1,TPM3,USP34,VPS53,WDFY3,ZNF462	63	4.32e-05	0.0115	0.0057716	4.4	ADAMTSL4,ADM,AKAP9,ANKLE2,ARID1A,ARL14EP,ASH1L,ATM,ATP1A1,ATRX,BRCA2,CDC5L,CENPE,CHD2,CNBP,COL27A1,DNM1L,DSE,DSP,DST,DSTYK,ERCC5,FLNA,GNPTAB,IL1R1,KIF1B,LUZP1,MACF1,MCL1,MCM3AP,MRE11,MRPS16,MTAP,PABPN1,PAFAH1B1,PARP14,PBX1,PCYT1A,PEX26,PIK3C2A,PPP1R15B,PTPN11,RALA,RBM8A,RCAN1,RIN2,RPL35A,RPL5,RPS10,RPSA,SASH1,SBDS,SKI,SLC40A1,SMAD4,SPG7,STRA6,TPM1,TPM3,USP34,VPS53,WDFY3,ZNF462	63
Skeletal and Muscular Disorders	4.47e-05	0.0115	0.00577235	4.3	ADAMTSL3,ADM,ANKLE2,ARID1A,ATM,ATP1A1,ATRX,BRCA2,CENPE,CNBP,DHX9,DNM1L,DSE,DSP,DST,ERCC5,FLNA,GNB4,IL1R1,INPP5D,KIAA0319L,KIF1B,KPNA3,MACF1,MCL1,MPHOSPH8,MTAP,PABPN1,PARP14,PNPLA8,PPP1R15B,PTMA,PTPN11,RALB,RIN2,RPSA,RRP36,SASH1,SKI,SLMAP,SMG1,SPG7,STRA6,TBCD,TPM1,TPM3,USP34,UTRN,VPS53,WDFY3,WWC2	51	4.47e-05	0.0115	0.00577235	4.3	ADAMTSL3,ADM,ANKLE2,ARID1A,ATM,ATP1A1,ATRX,BRCA2,CENPE,CNBP,DHX9,DNM1L,DSE,DSP,DST,ERCC5,FLNA,GNB4,IL1R1,INPP5D,KIAA0319L,KIF1B,KPNA3,MACF1,MCL1,MPHOSPH8,MTAP,PABPN1,PARP14,PNPLA8,PPP1R15B,PTMA,PTPN11,RALB,RIN2,RPSA,RRP36,SASH1,SKI,SLMAP,SMG1,SPG7,STRA6,TBCD,TPM1,TPM3,USP34,UTRN,VPS53,WDFY3,WWC2	51
Hereditary Disorder	6.69e-05	0.0115	0.00578345	4.2	ADAMTSL4,ADM,AKAP10,AKAP9,ANKLE2,ARID1A,ASH1L,ATM,ATP1A1,ATRX,BRCA2,CDC5L,CENPE,CHD2,CNBP,COL27A1,COLGALT1,DNM1L,DSE,DSP,DST,DSTYK,ERCC5,FLNA,GNB4,GNPTAB,IL1R1,KIF1B,MACF1,MCM3AP,MLLT10,MRE11,MRPS16,MTAP,OPTN,PABPN1,PAFAH1B1,PARP14,PBX1,PCYT1A,PEX26,PIK3C2A,PNPLA8,PPP1R12A,PPP1R15B,PTPN11,RAD50,RBM8A,RCAN1,RIN2,RPL35A,RPL5,RPS10,RPSA,SASH1,SBDS,SH3GL1,SKI,SLC40A1,SLMAP,SMAD4,SPG7,STRA6,TBCD,TFDP2…	75	6.69e-05	0.0115	0.00578345	4.2	ADAMTSL4,ADM,AKAP10,AKAP9,ANKLE2,ARID1A,ASH1L,ATM,ATP1A1,ATRX,BRCA2,CDC5L,CENPE,CHD2,CNBP,COL27A1,COLGALT1,DNM1L,DSE,DSP,DST,DSTYK,ERCC5,FLNA,GNB4,GNPTAB,IL1R1,KIF1B,MACF1,MCM3AP,MLLT10,MRE11,MRPS16,MTAP,OPTN,PABPN1,PAFAH1B1,PARP14,PBX1,PCYT1A,PEX26,PIK3C2A,PNPLA8,PPP1R12A,PPP1R15B,PTPN11,RAD50,RBM8A,RCAN1,RIN2,RPL35A,RPL5,RPS10,RPSA,SASH1,SBDS,SH3GL1,SKI,SLC40A1,SLMAP,SMAD4,SPG7,STRA6,TBCD,TFDP2…	75
Infectious Diseases	8.98e-05	0.00881	0.0044499	4	ADM,ARHGEF12,ARID1A,ATP1A1,CDC5L,CHMP3,CYSLTR1,DHX9,DNM1L,EIF3I,ERCC5,FAU,FLNA,H1-2,HNRNPC,HSPA5,IL1R1,ITSN2,KLF2,MCL1,MRE11,NOP53,OPTN,P2RY1,PARP11,PARP14,PPP1R15A,PPP1R15B,PTPN11,RALB,RAP1B,RBM5,RHOQ,RNPS1,RPL12,RPL13A,RPL5,RPS10,RPSA,SAP30BP,SLC25A6,SLU7,SPG7,TAOK1,TFDP2,TPM3,VPS53,ZNF417/ZNF587	48	8.98e-05	0.00881	0.0044499	4	ADM,ARHGEF12,ARID1A,ATP1A1,CDC5L,CHMP3,CYSLTR1,DHX9,DNM1L,EIF3I,ERCC5,FAU,FLNA,H1-2,HNRNPC,HSPA5,IL1R1,ITSN2,KLF2,MCL1,MRE11,NOP53,OPTN,P2RY1,PARP11,PARP14,PPP1R15A,PPP1R15B,PTPN11,RALB,RAP1B,RBM5,RHOQ,RNPS1,RPL12,RPL13A,RPL5,RPS10,RPSA,SAP30BP,SLC25A6,SLU7,SPG7,TAOK1,TFDP2,TPM3,VPS53,ZNF417/ZNF587	48
Inflammatory Response	0.000131	0.0115	0.0058155	3.6	ADM,ATM,DNM1L,IL1R1,INPP5D,MCL1,PTMA,RALB,RPSA,SMAD4,TBCD,VPS53	12	0.000131	0.0115	0.0058155	3.6	ADM,ATM,DNM1L,IL1R1,INPP5D,MCL1,PTMA,RALB,RPSA,SMAD4,TBCD,VPS53	12
Reproductive System Disease	0.000248	0.0115	0.005874	3.6	ADAMTSL3,AKAP10,AKAP11,AKAP9,ANAPC4,ANKLE2,AP1G1,ARHGEF12,ARID1A,ASH1L,ATM,ATP1A1,ATP6V1D,ATRX,ATXN1L,BCYRN1,BDP1,BRCA2,CCP110,CCT3,CDC5L,CENPE,CEP112,CEP126,CHD2,CHFR,CKAP5,COL27A1,CYSLTR1,DDX17,DGKZ,DHX9,DIXDC1,DNM1L,DPY19L4,DSE,DSP,DST,DSTYK,ECPAS,EIF3I,ENO1,EP400,ERCC5,FLNA,FNDC3B,GNB4,GTPBP4,H1-2,HSPA5,IL1R1,IMMT,ING5,INPP5D,ITGA1,ITSN2,KIF1B,KLC1,LINC00472,LUZP1,MACF1,MAP3K8,MAPKAPK2,MBD1,M…	129	0.000248	0.0115	0.005874	3.6	ADAMTSL3,AKAP10,AKAP11,AKAP9,ANAPC4,ANKLE2,AP1G1,ARHGEF12,ARID1A,ASH1L,ATM,ATP1A1,ATP6V1D,ATRX,ATXN1L,BCYRN1,BDP1,BRCA2,CCP110,CCT3,CDC5L,CENPE,CEP112,CEP126,CHD2,CHFR,CKAP5,COL27A1,CYSLTR1,DDX17,DGKZ,DHX9,DIXDC1,DNM1L,DPY19L4,DSE,DSP,DST,DSTYK,ECPAS,EIF3I,ENO1,EP400,ERCC5,FLNA,FNDC3B,GNB4,GTPBP4,H1-2,HSPA5,IL1R1,IMMT,ING5,INPP5D,ITGA1,ITSN2,KIF1B,KLC1,LINC00472,LUZP1,MACF1,MAP3K8,MAPKAPK2,MBD1,M…	129
Hematological Disease	0.000255	0.0115	0.0058775	3.1	ADAMTSL3,AKAP11,AKAP9,ANAPC4,ANKLE2,ARID1A,ASH1L,ATM,ATP1A1,ATRX,BDP1,BRCA2,CCP110,CCT3,CDV3,CEP112,CEP126,CHD2,COL27A1,DGKZ,DNM1L,DSE,DSP,DST,ECPAS,EHD1,EIF3I,ENO1,EP400,ERICH1,FLNA,FNDC3B,GGA3,GNAI1,GNPTAB,H1-2,HSPA5,IL1R1,ING5,ITGA1,ITSN2,KIF1B,KLC1,KLF2,KPNA3,MACF1,MAN2A1,MAP3K8,MAPKAPK2,MBD1,MCL1,MLLT10,MRE11,MRPS16,MTUS1,NFIC,OIP5-AS1,PARP11,PARP14,PPP1R15A,PTPN11,RAD50,RALA,REV1,RPL13A,RPL…	90	0.000255	0.0115	0.0058775	3.1	ADAMTSL3,AKAP11,AKAP9,ANAPC4,ANKLE2,ARID1A,ASH1L,ATM,ATP1A1,ATRX,BDP1,BRCA2,CCP110,CCT3,CDV3,CEP112,CEP126,CHD2,COL27A1,DGKZ,DNM1L,DSE,DSP,DST,ECPAS,EHD1,EIF3I,ENO1,EP400,ERICH1,FLNA,FNDC3B,GGA3,GNAI1,GNPTAB,H1-2,HSPA5,IL1R1,ING5,ITGA1,ITSN2,KIF1B,KLC1,KLF2,KPNA3,MACF1,MAN2A1,MAP3K8,MAPKAPK2,MBD1,MCL1,MLLT10,MRE11,MRPS16,MTUS1,NFIC,OIP5-AS1,PARP11,PARP14,PPP1R15A,PTPN11,RAD50,RALA,REV1,RPL13A,RPL…	90
Respiratory Disease	0.000315	0.0115	0.0059075	3	ADAMTSL3,AKAP9,AP1G1,ARHGEF12,ARID1A,ASH1L,ATM,ATP1A1,ATRX,BDP1,BRCA2,CAMSAP2,CCP110,CDV3,CENPC,CENPE,CEP126,CHD2,COL27A1,CTTNBP2NL,CYSLTR1,DBI,DDX17,DGKZ,DHX9,DIXDC1,DPY19L4,DSE,DSP,DST,ECPAS,EHD1,ENO1,EP400,ERCC5,ERICH1,FLNA,GBP4,GNL3L,GTPBP4,H1-2,HSPA5,IMMT,ITGA1,ITSN2,JMY,KIF1B,LINC00472,MACF1,MAN2A1,MAP3K8,MAPKAPK2,MCL1,MLLT10,MRE11,MTAP,MTIF3,MTUS1,MYO10,NACA,NOP53,NUB1,OIP5-AS1,OSBPL8,PARP…	102	0.000315	0.0115	0.0059075	3	ADAMTSL3,AKAP9,AP1G1,ARHGEF12,ARID1A,ASH1L,ATM,ATP1A1,ATRX,BDP1,BRCA2,CAMSAP2,CCP110,CDV3,CENPC,CENPE,CEP126,CHD2,COL27A1,CTTNBP2NL,CYSLTR1,DBI,DDX17,DGKZ,DHX9,DIXDC1,DPY19L4,DSE,DSP,DST,ECPAS,EHD1,ENO1,EP400,ERCC5,ERICH1,FLNA,GBP4,GNL3L,GTPBP4,H1-2,HSPA5,IMMT,ITGA1,ITSN2,JMY,KIF1B,LINC00472,MACF1,MAN2A1,MAP3K8,MAPKAPK2,MCL1,MLLT10,MRE11,MTAP,MTIF3,MTUS1,MYO10,NACA,NOP53,NUB1,OIP5-AS1,OSBPL8,PARP…	102
Immunological Disease	0.000665	0.0115	0.0060825	3.2	ADAMTSL3,ADM,AKAP11,ANKLE2,ARID1A,ATM,ATRX,BRCA2,CCP110,CCT3,CDV3,CHD2,COL27A1,DGKZ,DNM1L,DSP,DST,EHD1,ENO1,EP400,ERICH1,FLNA,FNDC3B,GGA3,GNAI1,GNPTAB,H1-2,HSPA5,IL1R1,ING5,ITSN2,KLC1,KLF2,KPNA3,MACF1,MAN2A1,MAP3K8,MAPKAPK2,MBD1,MCL1,MLLT10,MRE11,MRPS16,MTUS1,NFIC,OIP5-AS1,PPP1R15A,PTMA,PTPN11,RAD50,RALA,RALB,RPSA,SASH1,SBDS,SH3GL1,SKI,TAOK1,TBCD,TNRC18,TPM1,USO1,USP34,VPS53,WDFY3,XPC,YTHDF2,ZNF3…	68	0.000665	0.0115	0.0060825	3.2	ADAMTSL3,ADM,AKAP11,ANKLE2,ARID1A,ATM,ATRX,BRCA2,CCP110,CCT3,CDV3,CHD2,COL27A1,DGKZ,DNM1L,DSP,DST,EHD1,ENO1,EP400,ERICH1,FLNA,FNDC3B,GGA3,GNAI1,GNPTAB,H1-2,HSPA5,IL1R1,ING5,ITSN2,KLC1,KLF2,KPNA3,MACF1,MAN2A1,MAP3K8,MAPKAPK2,MBD1,MCL1,MLLT10,MRE11,MRPS16,MTUS1,NFIC,OIP5-AS1,PPP1R15A,PTMA,PTPN11,RAD50,RALA,RALB,RPSA,SASH1,SBDS,SH3GL1,SKI,TAOK1,TBCD,TNRC18,TPM1,USO1,USP34,VPS53,WDFY3,XPC,YTHDF2,ZNF3…	68
Dermatological Diseases and Conditions	0.000798	0.0115	0.006149	3.1	ADAMTSL3,ADAMTSL4,ADM,AKAP10,AKAP11,AKAP9,ANAPC4,ANKLE2,AP1G1,ARHGAP4,ARHGEF12,ARID1A,ASH1L,ATM,ATP1A1,ATP6V1D,ATRX,BDP1,BRCA2,BTBD7,CAMSAP2,CCP110,CCT3,CDC5L,CENPC,CENPE,CEP112,CEP126,CHD2,CHMP3,CKAP5,COL27A1,COLGALT1,COMMD2,CTDSPL2,CTTNBP2NL,CYSLTR1,DDAH2,DDX17,DGKZ,DHX9,DPY19L4,DSE,DSP,DST,DSTYK,ECPAS,EHD1,ENO1,EP400,ERCC5,ERICH1,FAXDC2,FLNA,FNDC3B,GBP4,GGA3,GNL3L,GNPTAB,GTDC1,GTPBP4,HSPA5,IL1…	167	0.000798	0.0115	0.006149	3.1	ADAMTSL3,ADAMTSL4,ADM,AKAP10,AKAP11,AKAP9,ANAPC4,ANKLE2,AP1G1,ARHGAP4,ARHGEF12,ARID1A,ASH1L,ATM,ATP1A1,ATP6V1D,ATRX,BDP1,BRCA2,BTBD7,CAMSAP2,CCP110,CCT3,CDC5L,CENPC,CENPE,CEP112,CEP126,CHD2,CHMP3,CKAP5,COL27A1,COLGALT1,COMMD2,CTDSPL2,CTTNBP2NL,CYSLTR1,DDAH2,DDX17,DGKZ,DHX9,DPY19L4,DSE,DSP,DST,DSTYK,ECPAS,EHD1,ENO1,EP400,ERCC5,ERICH1,FAXDC2,FLNA,FNDC3B,GBP4,GGA3,GNL3L,GNPTAB,GTDC1,GTPBP4,HSPA5,IL1…	167
Cardiovascular Disease	0.00142	0.0115	0.00646	2.7	ADM,AKAP10,AKAP9,ATM,ATP1A1,BRCA2,COLGALT1,DSP,FLNA,LINC00472,P2RY1,PTPN11,RPL35A,RPL5,RPS10,SBDS,SKI,SLMAP,SMAD4,TPM1	20	0.00142	0.0115	0.00646	2.7	ADM,AKAP10,AKAP9,ATM,ATP1A1,BRCA2,COLGALT1,DSP,FLNA,LINC00472,P2RY1,PTPN11,RPL35A,RPL5,RPS10,SBDS,SKI,SLMAP,SMAD4,TPM1	20
Connective Tissue Disorders	0.0031	0.0115	0.0073	2.5	ADM,ANKLE2,ARID1A,ATRX,CENPE,DNM1L,DSP,DST,FLNA,IL1R1,MCL1,MTAP,PARP14,PPP1R15B,PTMA,PTPN11,RALB,RIN2,RPSA,TBCD,VPS53,WDFY3	22	0.0031	0.0115	0.0073	2.5	ADM,ANKLE2,ARID1A,ATRX,CENPE,DNM1L,DSP,DST,FLNA,IL1R1,MCL1,MTAP,PARP14,PPP1R15B,PTMA,PTPN11,RALB,RIN2,RPSA,TBCD,VPS53,WDFY3	22
Inflammatory Disease	0.0031	0.00908	0.00609	2.21538	ADM,DNM1L,IL1R1,MCL1,PTMA,RALB,RPSA,TBCD,VPS53	9	0.0031	0.00908	0.00609	2.21538	ADM,DNM1L,IL1R1,MCL1,PTMA,RALB,RPSA,TBCD,VPS53	9
Ophthalmic Disease	0.00875	0.0115	0.010125	1.9946	ADAMTSL4,KLC1,LINC00472,OPTN,PIK3C2A,RDH11,SMAD4,STRA6	8	0.00875	0.0115	0.010125	1.9946	ADAMTSL4,KLC1,LINC00472,OPTN,PIK3C2A,RDH11,SMAD4,STRA6	8
Metabolic Disease	0.0115	0.0115	0.0115	1.9393	ATM,DNM1L,GNPTAB,IL1R1,MRPS16,PNPLA8,PPP1R15B,RIN2,SLC40A1,XPC	10	0.0115	0.0115	0.0115	1.9393	ATM,DNM1L,GNPTAB,IL1R1,MRPS16,PNPLA8,PPP1R15B,RIN2,SLC40A1,XPC	10
Nutritional Disease	0.0115	0.0115	0.0115	1.9393	SLC40A1	1	0.0115	0.0115	0.0115	1.9393	SLC40A1	1
Psychological Disorders	0.0115	0.0115	0.0115	1.9393	OPTN,TBCD	2	0.0115	0.0115	0.0115	1.9393	OPTN,TBCD	2
Tumor Morphology	0.0115	0.0115	0.0115	1.9393	MCL1	1	0.0115	0.0115	0.0115	1.9393	MCL1	1

## Sheet: Molecular and Cellular Function
Supplemental Table 2b. Molecular and cellular functions (n=25) enriched among the 244 WMD-associated genes as indicated by echolucency (ELX) and/or ventriculomegaly (VLM).
Category	lower p-value (elx)	upper p-value (elx)	avj p-value (elx)	Fisher's neg log(p-value)	Molecules (elx)	Molecule Total	lower p-value (vlm)	upper p-value (vlm)	avj p-value (vlm)	neg log(p-value)	Molecules (vlm)	Molecule Total
RNA Damage and Repair	2.18e-11	2.18e-11	2.18e-11	10.6	RBM8A,RNPS1,RPL12,RPL13A,RPL24,RPL35A,RPL5,RPLP1,RPLP2,RPS10,RPS11,RPS8,RPSA,SMG1	14	2.18e-11	2.18e-11	2.18e-11	10.6	RBM8A,RNPS1,RPL12,RPL13A,RPL24,RPL35A,RPL5,RPLP1,RPLP2,RPS10,RPS11,RPS8,RPSA,SMG1	14
Protein Synthesis	3.4e-08	0.000557	0.000278517	7.4	ANAPC4,CCT3,ECPAS,EIF3I,FLNA,GGA3,GNL3L,GTPBP4,KLF2,MRPS16,MRPS26,NOP53,NUB1,PPM1G,PTBP1,RPL12,RPL13A,RPL24,RPL35A,RPL5,RPLP1,RPLP2,RPS10,RPS11,RPS8,RPSA,SEL1L,SKI,SPG7,UBE4A,VPS35	31	3.4e-08	0.000557	0.000278517	7.4	ANAPC4,CCT3,ECPAS,EIF3I,FLNA,GGA3,GNL3L,GTPBP4,KLF2,MRPS16,MRPS26,NOP53,NUB1,PPM1G,PTBP1,RPL12,RPL13A,RPL24,RPL35A,RPL5,RPLP1,RPLP2,RPS10,RPS11,RPS8,RPSA,SEL1L,SKI,SPG7,UBE4A,VPS35	31
Cellular Assembly and Organization	1.36e-07	0.0115	0.00575007	6.8	ADM,AKAP11,AKAP9,ARHGAP4,ARHGEF12,ARID1A,ATM,ATP6V1D,BRCA2,CAMSAP2,CCP110,CENPC,CENPE,CEP126,CHMP3,CKAP5,COLGALT1,DNM1L,DSP,DST,FLNA,GNAI1,GNL3L,GNPTAB,HNRNPC,KLF2,LUZP1,MACF1,MRE11,MTUS1,MYO10,OIP5-AS1,OPTN,P3H4,PAFAH1B1,PCM1,PEX26,PFDN2,PIK3C2A,PTPN11,RAD50,RALA,RALB,RBM5,REV1,RHOQ,RNF19A,RPS10,SBDS,SCAF11,SMAD4,STXBP3,TAOK1,TBCD,TERF1,TMED9,TNRC6A,TPM1,TPM3,TRPV6,VPS35,WIPI1	62	1.36e-07	0.0115	0.00575007	6.8	ADM,AKAP11,AKAP9,ARHGAP4,ARHGEF12,ARID1A,ATM,ATP6V1D,BRCA2,CAMSAP2,CCP110,CENPC,CENPE,CEP126,CHMP3,CKAP5,COLGALT1,DNM1L,DSP,DST,FLNA,GNAI1,GNL3L,GNPTAB,HNRNPC,KLF2,LUZP1,MACF1,MRE11,MTUS1,MYO10,OIP5-AS1,OPTN,P3H4,PAFAH1B1,PCM1,PEX26,PFDN2,PIK3C2A,PTPN11,RAD50,RALA,RALB,RBM5,REV1,RHOQ,RNF19A,RPS10,SBDS,SCAF11,SMAD4,STXBP3,TAOK1,TBCD,TERF1,TMED9,TNRC6A,TPM1,TPM3,TRPV6,VPS35,WIPI1	62
Cellular Function and Maintenance	1.36e-07	0.0115	0.00575007	6.8	ADM,AKAP11,AKAP9,ARHGAP4,ARID1A,ATM,ATP1A1,ATP6V1D,BRCA2,CAMSAP2,CCP110,CENPE,CEP126,CHMP3,CKAP5,COLGALT1,CYSLTR1,DAP,DNM1L,DSP,DST,FLNA,GNAI1,GNPTAB,IMMT,LUZP1,MACF1,MCL1,MRE11,MTUS1,MYO10,OPTN,P2RY1,PAFAH1B1,PAFAH1B2,PCM1,PFDN2,PIK3C2A,PIP4K2A,PTPN11,RAD50,RALA,RALB,RAP1B,REV1,RHOQ,RNF19A,SBDS,SLC25A6,SLC40A1,SLU7,SMAD4,SPG7,STXBP3,TAOK1,TBCD,TERF1,TMED9,TPM1,TRPV6,UBE2J1,VPS35,WIPI1,XPC	64	1.36e-07	0.0115	0.00575007	6.8	ADM,AKAP11,AKAP9,ARHGAP4,ARID1A,ATM,ATP1A1,ATP6V1D,BRCA2,CAMSAP2,CCP110,CENPE,CEP126,CHMP3,CKAP5,COLGALT1,CYSLTR1,DAP,DNM1L,DSP,DST,FLNA,GNAI1,GNPTAB,IMMT,LUZP1,MACF1,MCL1,MRE11,MTUS1,MYO10,OPTN,P2RY1,PAFAH1B1,PAFAH1B2,PCM1,PFDN2,PIK3C2A,PIP4K2A,PTPN11,RAD50,RALA,RALB,RAP1B,REV1,RHOQ,RNF19A,SBDS,SLC25A6,SLC40A1,SLU7,SMAD4,SPG7,STXBP3,TAOK1,TBCD,TERF1,TMED9,TPM1,TRPV6,UBE2J1,VPS35,WIPI1,XPC	64
Cell Death and Survival	1.9e-07	0.0115	0.0057501	6.7	ADAMTSL4,ADM,AKAP11,ANAPC4,ANKLE2,ARHGAP4,ARHGEF12,ARID1A,ATM,ATP1A1,ATRX,BCYRN1,BRCA2,CCP110,CENPE,CHFR,CKAP5,DAP,DDAH2,DDX17,DHX9,DNM1L,DSP,DSTYK,EIF3I,ENO1,EP400,ERCC5,ESCO1,FAU,FLNA,GTPBP4,H1-2,HNRNPC,HSPA5,IMMT,ING5,INPP5D,KIF1B,KLF2,LINC00472,MAP3K8,MAPKAPK2,MBD1,MCL1,METAP2,MRE11,MTUS1,NOP53,OIP5-AS1,OPTN,OSBPL8,PARP14,PBX1,PFDN2,PIK3C2A,PPM1G,PPP1R15A,PRDX1,PTMA,PTPN11,RAD50,RALA,RALB,RAP…	90	1.9e-07	0.0115	0.0057501	6.7	ADAMTSL4,ADM,AKAP11,ANAPC4,ANKLE2,ARHGAP4,ARHGEF12,ARID1A,ATM,ATP1A1,ATRX,BCYRN1,BRCA2,CCP110,CENPE,CHFR,CKAP5,DAP,DDAH2,DDX17,DHX9,DNM1L,DSP,DSTYK,EIF3I,ENO1,EP400,ERCC5,ESCO1,FAU,FLNA,GTPBP4,H1-2,HNRNPC,HSPA5,IMMT,ING5,INPP5D,KIF1B,KLF2,LINC00472,MAP3K8,MAPKAPK2,MBD1,MCL1,METAP2,MRE11,MTUS1,NOP53,OIP5-AS1,OPTN,OSBPL8,PARP14,PBX1,PFDN2,PIK3C2A,PPM1G,PPP1R15A,PRDX1,PTMA,PTPN11,RAD50,RALA,RALB,RAP…	90
RNA Post-Transcriptional Modification	4.55e-07	0.0109	0.00545023	6.4	CDC5L,DDX17,DHX9,HNRNPC,PABPN1,PRPF3,PTBP1,RBM5,RBM8A,RNPS1,RPL35A,RPL5,RRP36,SBDS,SCAF11,SLU7,WDR75	17	4.55e-07	0.0109	0.00545023	6.4	CDC5L,DDX17,DHX9,HNRNPC,PABPN1,PRPF3,PTBP1,RBM5,RBM8A,RNPS1,RPL35A,RPL5,RRP36,SBDS,SCAF11,SLU7,WDR75	17
Cell Cycle	9.96e-06	0.0115	0.00575498	5	AKAP9,ARID1A,ATM,ATRX,BRCA2,CCP110,CENPC,CENPE,CHFR,CHMP3,CKAP5,DDX17,DNM1L,EP400,ERCC5,ESCO1,FLNA,GNAI1,GNL3L,GTPBP4,HNRNPC,HSPA5,IL1R1,ING5,MAPKAPK2,MCL1,MCM3AP,METAP2,MRE11,MTUS1,NFIC,NOP53,OIP5-AS1,OPTN,PAFAH1B1,PARP11,PBX1,PCM1,PPP1R12A,PPP1R15A,PRDX1,PTMA,PTPN11,RAD50,RALB,RBM5,REV1,RPL5,SEL1L,SMAD4,SPDL1,TAOK1,TBCD,TERF1,XPC,ZFYVE26	56	9.96e-06	0.0115	0.00575498	5	AKAP9,ARID1A,ATM,ATRX,BRCA2,CCP110,CENPC,CENPE,CHFR,CHMP3,CKAP5,DDX17,DNM1L,EP400,ERCC5,ESCO1,FLNA,GNAI1,GNL3L,GTPBP4,HNRNPC,HSPA5,IL1R1,ING5,MAPKAPK2,MCL1,MCM3AP,METAP2,MRE11,MTUS1,NFIC,NOP53,OIP5-AS1,OPTN,PAFAH1B1,PARP11,PBX1,PCM1,PPP1R12A,PPP1R15A,PRDX1,PTMA,PTPN11,RAD50,RALB,RBM5,REV1,RPL5,SEL1L,SMAD4,SPDL1,TAOK1,TBCD,TERF1,XPC,ZFYVE26	56
DNA Replication, Recombination, and Repair	2.67e-05	0.0112	0.00561335	4.6	ADM,ARID1A,ATM,ATRX,BRCA2,CCP110,CENPC,CENPE,CHFR,CHMP3,DHX9,ESCO1,FLNA,GTPBP4,HNRNPC,ING5,KLF2,MAPKAPK2,MCL1,MCM3AP,MRE11,NOP53,P3H4,PCM1,PPM1G,PPP1R15A,PTBP1,PTPN11,RAD50,REV1,RTF1,SMG1,TAOK1,TERF1,TNRC6A	35	2.67e-05	0.0112	0.00561335	4.6	ADM,ARID1A,ATM,ATRX,BRCA2,CCP110,CENPC,CENPE,CHFR,CHMP3,DHX9,ESCO1,FLNA,GTPBP4,HNRNPC,ING5,KLF2,MAPKAPK2,MCL1,MCM3AP,MRE11,NOP53,P3H4,PCM1,PPM1G,PPP1R15A,PTBP1,PTPN11,RAD50,REV1,RTF1,SMG1,TAOK1,TERF1,TNRC6A	35
Cell Morphology	9.97e-05	0.0115	0.00579985	4	AKAP11,AKAP9,ARID1A,ATM,ATP6V1D,BRCA2,CAMSAP2,CCP110,CDC5L,CENPE,CEP126,CHMP3,CKAP5,DAP,DNM1L,DST,EP400,FLNA,IL1R1,INPP5D,KLF2,LUZP1,MAPKAPK2,MCL1,MRE11,MYO10,NOP53,OIP5-AS1,OPTN,PAFAH1B2,PCM1,PIK3C2A,PIP4K2A,RAD50,RALA,RALB,RAP1B,REV1,RHOQ,SLU7,SMAD4,SPG7,STXBP3,TERF1,TPM1,WIPI1,XPC	47	9.97e-05	0.0115	0.00579985	4	AKAP11,AKAP9,ARID1A,ATM,ATP6V1D,BRCA2,CAMSAP2,CCP110,CDC5L,CENPE,CEP126,CHMP3,CKAP5,DAP,DNM1L,DST,EP400,FLNA,IL1R1,INPP5D,KLF2,LUZP1,MAPKAPK2,MCL1,MRE11,MYO10,NOP53,OIP5-AS1,OPTN,PAFAH1B2,PCM1,PIK3C2A,PIP4K2A,RAD50,RALA,RALB,RAP1B,REV1,RHOQ,SLU7,SMAD4,SPG7,STXBP3,TERF1,TPM1,WIPI1,XPC	47
Lipid Metabolism	0.000131	0.0115	0.0058155	3.8	DBI,DGKZ,HSPA5,INPP5D,PAFAH1B1,PAFAH1B2,PCYT1A,PIK3C2A,PIP4K2A,PNPLA8,SLC39A9	11	0.000131	0.0115	0.0058155	3.8	DBI,DGKZ,HSPA5,INPP5D,PAFAH1B1,PAFAH1B2,PCYT1A,PIK3C2A,PIP4K2A,PNPLA8,SLC39A9	11
Small Molecule Biochemistry	0.000131	0.0115	0.0058155	3.8	DBI,DGKZ,GNAI1,HSPA5,INPP5D,PAFAH1B1,PAFAH1B2,PCYT1A,PIK3C2A,PIP4K2A,PNPLA8,SLC39A9	12	0.000131	0.0115	0.0058155	3.8	DBI,DGKZ,GNAI1,HSPA5,INPP5D,PAFAH1B1,PAFAH1B2,PCYT1A,PIK3C2A,PIP4K2A,PNPLA8,SLC39A9	12
Cellular Development	0.000141	0.0115	0.0058205	3.8	ADM,AKAP9,AP1G1,ARID1A,ATM,BCYRN1,BRCA2,CCT3,CENPE,DDX17,EIF3I,ENO1,FLNA,GTPBP4,H1-2,HSPA5,IMMT,ITGA1,KIF1B,KLF2,LINC00472,MAPKAPK2,MBD1,MCL1,MTAP,MTUS1,NACA,NOP53,NUB1,OIP5-AS1,PAFAH1B1,PBX1,PIK3C2A,PIP4K2A,PNPLA8,PPP1R12A,PRPF3,PTBP1,PTMA,PTPN11,RALA,RALB,RAP1B,RBM5,REV1,RPS10,SBDS,SEL1L,SH3GL1,SKI,SLC25A6,SLC40A1,SMAD4,SPDL1,TERF1,TPM1,UBE2J1,UTRN,VPS35,XPC,YTHDF2	61	0.000141	0.0115	0.0058205	3.8	ADM,AKAP9,AP1G1,ARID1A,ATM,BCYRN1,BRCA2,CCT3,CENPE,DDX17,EIF3I,ENO1,FLNA,GTPBP4,H1-2,HSPA5,IMMT,ITGA1,KIF1B,KLF2,LINC00472,MAPKAPK2,MBD1,MCL1,MTAP,MTUS1,NACA,NOP53,NUB1,OIP5-AS1,PAFAH1B1,PBX1,PIK3C2A,PIP4K2A,PNPLA8,PPP1R12A,PRPF3,PTBP1,PTMA,PTPN11,RALA,RALB,RAP1B,RBM5,REV1,RPS10,SBDS,SEL1L,SH3GL1,SKI,SLC25A6,SLC40A1,SMAD4,SPDL1,TERF1,TPM1,UBE2J1,UTRN,VPS35,XPC,YTHDF2	61
Cellular Growth and Proliferation	0.000141	0.0115	0.0058205	3.8	ADM,AKAP9,AP1G1,ARID1A,ATM,BCYRN1,BRCA2,CCT3,CENPE,DDX17,EIF3I,FLNA,GTPBP4,H1-2,HSPA5,IMMT,ITGA1,KLF2,LINC00472,MAPKAPK2,MCL1,METAP2,MTAP,MTUS1,NACA,NOP53,NUB1,OIP5-AS1,PAFAH1B1,PBX1,PIK3C2A,PIP4K2A,PNPLA8,PPP1R12A,PPP1R15A,PRPF3,PTBP1,PTMA,PTPN11,RALA,RALB,RAP1B,RBM5,RPS10,SBDS,SEL1L,SH3GL1,SKI,SLC25A6,SLC40A1,SMAD4,TERF1,TPM1,UBE2J1,UTRN,VPS35,XPC,YTHDF2	58	0.000141	0.0115	0.0058205	3.8	ADM,AKAP9,AP1G1,ARID1A,ATM,BCYRN1,BRCA2,CCT3,CENPE,DDX17,EIF3I,FLNA,GTPBP4,H1-2,HSPA5,IMMT,ITGA1,KLF2,LINC00472,MAPKAPK2,MCL1,METAP2,MTAP,MTUS1,NACA,NOP53,NUB1,OIP5-AS1,PAFAH1B1,PBX1,PIK3C2A,PIP4K2A,PNPLA8,PPP1R12A,PPP1R15A,PRPF3,PTBP1,PTMA,PTPN11,RALA,RALB,RAP1B,RBM5,RPS10,SBDS,SEL1L,SH3GL1,SKI,SLC25A6,SLC40A1,SMAD4,TERF1,TPM1,UBE2J1,UTRN,VPS35,XPC,YTHDF2	58
Cellular Response to Therapeutics	0.000168	0.00454	0.002354	3.7	ARID1A,ATRX,BRCA2,IMMT,MAP3K8,MTIF3,PCM1,PPM1G,PPP1R15B,PRDX1,PTPN11,RAD50,RNF19A,SMG1,USP34	15	0.000168	0.00454	0.002354	3.7	ARID1A,ATRX,BRCA2,IMMT,MAP3K8,MTIF3,PCM1,PPM1G,PPP1R15B,PRDX1,PTPN11,RAD50,RNF19A,SMG1,USP34	15
Gene Expression	0.000406	04-8E-03	0.000406	3.4	ARID1A,ATM,ATRX,BRCA2,CDC5L,CHD2,CNBP,DAP,DDX17,DHX9,DIXDC1,EIF3I,ENO1,ERCC5,FLNA,HNRNPC,ING5,KLF2,MAP3K8,MBD1,MLLT10,MPHOSPH8,MRE11,NFIC,NOP53,PABPN1,PARP14,PPP1R12A,PTMA,PTPN11,RBM5,RCAN1,RHOQ,RNPS1,RPL12,RPL13A,RPL5,RTF1,SKI,SLU7,SMAD4,SMG1,TFDP2,TNRC6A,VPS35,WDR75,WWC2,XPC,ZNF417/ZNF587	49	4.06E	04-8E-03	0.000406	3.4	ARID1A,ATM,ATRX,BRCA2,CDC5L,CHD2,CNBP,DAP,DDX17,DHX9,DIXDC1,EIF3I,ENO1,ERCC5,FLNA,HNRNPC,ING5,KLF2,MAP3K8,MBD1,MLLT10,MPHOSPH8,MRE11,NFIC,NOP53,PABPN1,PARP14,PPP1R12A,PTMA,PTPN11,RBM5,RCAN1,RHOQ,RNPS1,RPL12,RPL13A,RPL5,RTF1,SKI,SLU7,SMAD4,SMG1,TFDP2,TNRC6A,VPS35,WDR75,WWC2,XPC,ZNF417/ZNF587	49
Protein Degradation	0.000557	0.000557	0.000557	3.3	CCT3,FLNA,GGA3,GNL3L,GTPBP4,NOP53,RPL5,SEL1L,VPS35	9	0.000557	0.000557	0.000557	3.3	CCT3,FLNA,GGA3,GNL3L,GTPBP4,NOP53,RPL5,SEL1L,VPS35	9
Carbohydrate Metabolism	0.000772	0.0115	0.006136	3.2	DBI,DGKZ,HSPA5,INPP5D,PAFAH1B1,PAFAH1B2,PCYT1A,PIK3C2A,PIP4K2A,PNPLA8	10	0.000772	0.0115	0.006136	3.2	DBI,DGKZ,HSPA5,INPP5D,PAFAH1B1,PAFAH1B2,PCYT1A,PIK3C2A,PIP4K2A,PNPLA8	10
Cell-To-Cell Signaling and Interaction	0.00128	0.0115	0.00639	2.8	ATM,DNM1L,DSP,HSPA5,METAP2,PPP1R15A,TRPV6	7	0.00128	0.0115	0.00639	2.8	ATM,DNM1L,DSP,HSPA5,METAP2,PPP1R15A,TRPV6	7
Cellular Movement	0.00162	0.0105	0.00606	2.7	ADM,AKAP11,AKAP9,ARHGEF12,ARID1A,ATM,BCYRN1,CHFR,CHMP3,DNM1L,DSE,DSP,DST,EIF3I,FLNA,GNAI1,GTPBP4,HSPA5,INPP5D,ITGA1,JMY,KLF2,LINC00472,MACF1,MAP3K8,MAPKAPK2,MCL1,MTUS1,MYO10,OIP5-AS1,PAFAH1B1,PIK3C2A,PTPN11,RALA,RALB,RALGAPA2,RAP1B,RCAN1,RIN2,SASH1,SBDS,SKI,SMAD4,SMG1,TERF1,TPM1,TPM3,ZFYVE26	48	0.00162	0.0105	0.00606	2.7	ADM,AKAP11,AKAP9,ARHGEF12,ARID1A,ATM,BCYRN1,CHFR,CHMP3,DNM1L,DSE,DSP,DST,EIF3I,FLNA,GNAI1,GTPBP4,HSPA5,INPP5D,ITGA1,JMY,KLF2,LINC00472,MACF1,MAP3K8,MAPKAPK2,MCL1,MTUS1,MYO10,OIP5-AS1,PAFAH1B1,PIK3C2A,PTPN11,RALA,RALB,RALGAPA2,RAP1B,RCAN1,RIN2,SASH1,SBDS,SKI,SMAD4,SMG1,TERF1,TPM1,TPM3,ZFYVE26	48
Post-Translational Modification	0.00667	0.00667	0.00667	2.2	CCT3,GNAI1,GNB4,PFDN2,TBCD	5	0.00667	0.00667	0.00667	2.2	CCT3,GNAI1,GNB4,PFDN2,TBCD	5
Protein Folding	0.00667	0.00667	0.00667	2.2	CCT3,GNAI1,GNB4,PFDN2,TBCD	5	0.00667	0.00667	0.00667	2.2	CCT3,GNAI1,GNB4,PFDN2,TBCD	5
Molecular Transport	0.00781	0.0115	0.009655	2.1	ADM,BRCA2,CKAP5,HSPA5,INPP5D,MAPKAPK2,PIK3C2A,PIP4K2A,RBM8A,RNPS1,SLU7,SMG1,STYX	13	0.00781	0.0115	0.009655	2.1	ADM,BRCA2,CKAP5,HSPA5,INPP5D,MAPKAPK2,PIK3C2A,PIP4K2A,RBM8A,RNPS1,SLU7,SMG1,STYX	13
RNA Trafficking	0.00781	0.00781	0.00781	2.1	CKAP5,RBM8A,RNPS1,SLU7,SMG1	5	0.00781	0.00781	0.00781	2.1	CKAP5,RBM8A,RNPS1,SLU7,SMG1	5
Cellular Compromise	0.00938	0.0115	0.01044	2	ATM,CENPE,RALA,RALB,RHOQ,USO1	6	0.00938	0.0115	0.01044	2	ATM,CENPE,RALA,RALB,RHOQ,USO1	6
Protein Trafficking	0.0115	0.0115	0.0115	1.9	ADM	1	0.0115	0.0115	0.0115	1.9	ADM	1
