# Supplementary material for: Placental transcriptional signatures associated with cerebral white matter damage in the neonate
Source: Front Neurosci. 2022 Oct 28;16:1017953. doi: 10.3389/fnins.2022.1017953 (PMC9650394; doi:10.3389/fnins.2022.1017953)
Supplement: Supplementary file 7 [file Table_4.xlsx]

## Sheet: Common n=244 UpstreamRegulators
Supplemental Table 4a. Upstream regulators identified (n=131) for 244 genes dysregulated in the placenta relative to both echolucency and ventriculomegaly
Upstream Regulator	Expr Log Ratio	Molecule Type	Predicted Activation State	Activation z-score	Flags	p-value of overlap	Target Molecules in Dataset
CD24		other	Activated	2	bias	0.00724	MTUS1,PPP1R15A,RAD50,SCAF11,USO1
EIF4G1		translation regulator	Activated	2.236	bias	4.91e-06	ATM,ATRX,BRCA2,MRE11,RAD50
LARP1		translation regulator	Inhibited	-2.646	bias	6.12e-05	RPL12,RPL13A,RPL24,RPL35A,RPL5,RPS11,RPS8
CST5		other	Inhibited	-2.496	bias	2.62e-05	CHD2,CNBP,DHX9,DSP,FAM133B,HNRNPC,MYO10,NOP53,PABPN1,PIP4K2A,PPIC,PRDX1,SCAF11
Collagen type II		complex				0.0323	IL1R1,MAP3K8
CCAR2		peptidase				0.00682	KIF1B,RAD50,SKI
CDK4/6		group		0	bias	0.000151	C11orf58,ENO1,FLNA,ITSN2,MACF1,PCYT1A
TCR		complex		1.628	bias	0.00554	ADM,ENO1,FLNA,GBP4,MAP3K8,RPL5,RPSA,ZNFX1
Actin		group				0.035	FLNA
FGFR		group				0.0235	MCL1
F Actin		complex				0.0118	FLNA
Histone h3		group				0.0113	CHFR,HSPA5,ING5,MTUS1,RCAN1,RPL12,RPL13A,TPM3
Clathrin		complex				0.0118	CKAP5
PRKAA		group				0.0298	MCL1,XPC
SFTPA2		other				0.0235	HSPA5
BAHCC1		other				0.0374	NFIC,PBX1
ZBED1		enzyme				0.035	RPL12
IgG		complex		-0.816	bias	0.00758	ADM,DSP,HSPA5,INPP5D,PPP1R15A,SLC40A1
CKAP2L		other				0.0247	CENPE,CKAP5,SPDL1
EIF4B		translation regulator				0.0118	MCL1
UBA5		enzyme				0.0464	HSPA5
MELK		kinase				0.0118	MCL1
MRTFB		transcription regulator				0.0432	ADM,SAMD5,TPM1
INSL5		other				0.0464	ENO1
EDEM1		enzyme				0.035	HSPA5
UFC1		enzyme				0.0464	HSPA5
SGF29		other				0.0235	HSPA5
CP		enzyme				0.0118	SLC40A1
CACNA1C		ion channel				0.0464	ENO1
STIL		other				0.0118	FLNA
CDK5RAP3		other				0.0464	HSPA5
DSC2		other				0.0235	DSP
DHCR24		enzyme				0.035	GGA3
ZNF326		transcription regulator				0.0235	RAD50
TEAD1		transcription regulator				0.0223	ADM,SAMD5,TPM1
CRBN		enzyme				0.0464	HSPA5
SDF4		other				0.035	HSPA5
STING1		other				0.0168	HSPA5,PPP1R15A
SLC26A4-AS1		other				0.000139	MRE11,RAD50
CHCHD6		other				0.0118	IMMT
CYSLTR2		G-protein coupled receptor				0.0235	CYSLTR1
TRIM65		other				0.035	IMMP1L
26s Proteasome		complex		-0.298	bias	0.00449	ATP6V1D,BRCA2,CENPE,SKI,WIPI1
EIF4F		complex				0.0235	MCL1
GRB2		other				0.0235	PTPN11
CCND1		transcription regulator		0		0.00412	C11orf58,ENO1,FLNA,ITSN2,MACF1,PCYT1A,UTRN,ZNF462
TEAD4		transcription regulator				0.0223	ADM,SAMD5,TPM1
SF3B1		other				0.035	MCL1
HOXA11		transcription regulator				0.0118	KLF2
SRI		transporter				0.0118	HSPA5
H6PD		enzyme				0.035	HSPA5
PFDN5		transcription regulator				0.0464	PFDN2
EPAS1		transcription regulator				0.0359	ADM,ENO1,MCM3AP,P2RY1
LSM10		other				0.0118	H1-2
A2M		transporter				0.0323	HSPA5,PPP1R15A
MAP3K12		kinase				0.0298	RPL12,RPS8
SLC2A4		transporter				0.0118	MCL1
GRK6		kinase				0.0235	MCL1
HPRT1		enzyme				0.0118	P2RY1
PMAIP1		other				0.0118	MCL1
LIMS1		other				0.0464	DNM1L
BCL2L11		other				0.0235	MCL1
VEGFA		growth factor				0.0101	ITGA1,MCL1,RCAN1
PGRMC1		transmembrane receptor				0.0235	PAQR7
TEAD3		transcription regulator				0.0151	ADM,SAMD5,TPM1
DNM3OS		other				0.000129	ATM,MRE11,RAD50
miR-344d-3p (and other miRNAs w/seed AUAUAAC)		mature microRNA				0.0118	OIP5-AS1
mir-25		microRNA				0.000977	ADM,MCL1,SCAF11
mir-368		microRNA				0.0235	SMAD4
mir-183		microRNA				0.0208	BRMS1L,SLC39A9
mir-181		microRNA				0.0323	ADM,MCL1
miR-30a-3p (and other miRNAs w/seed UUUCAGU)		mature microRNA				0.000426	KIF1B,PIK3C2A,SCAF11
miR-101-5p (miRNAs w/seed AGUUAUC)		mature microRNA				0.0235	ATM
miR-204-5p (and other miRNAs w/seed UCCCUUU)		mature microRNA				0.0235	PTPN11
miR-153-3p (miRNAs w/seed UGCAUAG)		mature microRNA				0.0118	MCL1
mir-489		microRNA				0.0464	PTPN11
mir-182		microRNA				0.0187	BRMS1L,SLC39A9
miR-149-5p (miRNAs w/seed CUGGCUC)		mature microRNA				0.0464	RAP1B
mir-96		microRNA				0.0168	BRMS1L,SLC39A9
RBM5-AS1		other				0.035	RBM5
TLE1		transcription regulator				0.035	MCL1
EIF2S1		translation regulator				0.035	MCL1
UPF2		other				0.0486	DSP,RCAN1
NBR1		other				0.0464	HSPA5
SEPTIN9		enzyme				0.035	ARHGAP4
MAPK9		kinase		-0.747		0.0043	BDP1,METAP2,PARP14,PPP1R15A
HSP90B1		other				0.0486	RPL12,RPLP2
SUPT16H		transcription regulator				0.0251	AP1G1,H1-2
RBM4		other				0.0235	MCL1
SAFB2		other				0.00274	PPP1R12A,RBM8A,RPL35A
ATF6		transcription regulator				0.0429	HSPA5,MCL1
SMARCE1		transcription regulator				0.0132	BRCA2,CENPE
PROK1		growth factor				0.0235	RCAN1
NFE2L1		transcription regulator				0.035	XPC
STXBP3	0.909	transporter				0.0118	HSPA5
SEM1		peptidase				0.0118	BRCA2
HEPH		transporter				0.0118	SLC40A1
IL12B		cytokine				0.0132	INPP5D,MAP3K8
NRP1		transmembrane receptor				0.0118	MCL1
DDIT3		transcription regulator				0.0168	HSPA5,MCL1
RBMX		other				0.0118	BRCA2
SFN		other				0.0323	DSP,IL1R1
KDELR1		transporter				0.0118	HSPA5
DDX19B		enzyme				0.0464	ATM
ATP2A1		transporter				0.0464	HSPA5
DDX3X		enzyme				0.00521	RPLP1,RPLP2,RPSA
UACA		other				0.0235	HSPA5
SLC37A4		transporter				0.035	HSPA5
PPP2R1A		phosphatase				0.035	MCL1
SSRP1		transcription regulator				0.0323	AP1G1,H1-2
ELF4		transcription regulator				0.0187	RAP1B,RCAN1
CUL4B		other				0.0251	EIF3I,TPM3
STAT5A		transcription regulator				0.0475	H1-2,MCL1,RIN2,TCEAL1
TNFSF10		cytokine				0.0298	MCL1,PPP1R15A
CSNK1A1		kinase				0.0464	HNRNPC
ERBB2		kinase		0.113	bias	0.0382	CENPE,DSE,GNPTAB,MAN2A1,MCL1,MYO10,RALB,TMED9,TPM1
SAFB		other		-1	bias	0.00329	MAP3K8,PPP1R12A,RBM8A,RPL35A
TEAD2		transcription regulator				0.0116	ADM,SAMD5,TPM1
CASP8AP2		transcription regulator				0.035	MCL1
GAB1		other				0.0118	PTPN11
CREB3L1		transcription regulator				0.035	HSPA5
EWSR1		other				0.0464	MCL1
PPP1R15A	0.788	other				0.0235	MCL1
FUS		transcription regulator				0.0274	FLNA,HSPA5
IFITM1		transmembrane receptor				0.0187	DDAH2,PARP11
TFE3		transcription regulator				0.035	VPS35
TP53		transcription regulator		1.912		1	MAP3K8,MCL1,MYO10,PTPN11,SEL1L,XPC
FLT3LG		cytokine				0.0464	MCL1
cytokine		group				0.0235	RPSA
G protein q		complex				0.0118	RCAN1

## Sheet: ELX UpstreamRegulators
Supplemental Table 4b. Upstream regulators identified (n=244) for 381 genes dysregulated in the placenta relative to echolucency
Upstream Regulator	Molecule Type	Predicted Activation State	Activation z-score	Flags	p-value of overlap	Target Molecules in Dataset
TCF4	transcription regulator	Inhibited	-2.236		0.298	CARD8,CREM,IGF2,IGFBP3,TRIM38
PTPRR	phosphatase	Inhibited	-2.219	bias	0.0247	CALCOCO1,DNMT1,PFKL,SLC44A2,THOP1
CST5	other	Inhibited	-2.214	bias	1.08e-05	AKAP12,CDH1,CTSB,DDX18,DDX21,ESRP1,GNL3,GOLGA2,IQGAP2,JMJD1C,KRT23,LAMC1,MNT,NR2F1,NRP1,RRP15,SRSF1
KRAS	enzyme		-1.958		0.0856	EZH2,LAMP1,SRPK2,TGFBR1
IKZF1	transcription regulator		-1.581	bias	0.0492	IL6ST,KLF4,RUBCN,ST3GAL6,TRIM38
NANOG	transcription regulator		-1		0.0227	EGR1,PHACTR2,PILRB,PRRC2C,ZFHX3
SPDEF	transcription regulator		-1	bias	0.00376	COL4A1,CYFIP1,ITGA6,LAMC1,PRKCA
ESR2	ligand-dependent nuclear receptor		-0.946		0.021	ACSL3,AKAP12,CDH1,IQGAP2,LTBP1,PIAS1,SCARB1
PPARG	ligand-dependent nuclear receptor		-0.762		0.0151	APP,CDH1,IGFBP3,SCARB1,TGFBR1
NUPR1	transcription regulator		-0.728		0.00819	AKAP12,CARD8,CD63,CHD4,CREB5,DDX46,EGLN1,FHL2,GNE,KLF4,MMD,MRTFB,NUCKS1,PIM1,PXDC1,SRSF1,WNK1
ESR1	ligand-dependent nuclear receptor		-0.412		0.000343	BAZ2A,CCNT2,CDH1,CTSB,DDX21,EDN1,ENAH,ITGA6,LTBP1,MMD,PLXNA2,PRLR,S100P,SCARB1,SETD2,SP110,TNPO1,ZNF703
GLI1	transcription regulator		-0.19		0.0152	ATAD2,CDH1,CDK19,CTSB,EGR1,IQGAP2,KLF4,PIM1,PNISR,RABL6,SERTAD4,SPP1,TMEM87A,UACA,ZFHX3
SYVN1	transporter		-0.128	bias	0.0325	ACSL3,APP,DAB2,HLA-A,ITGA6,SETX
MYO6	other		0	bias	0.00331	ERC1,NR2F1,SLC44A2,SYNPO2,TJP2,ZDHHC14
ZNF217	transcription regulator		0	bias	0.0111	ATAD2,CENPK,CREB5,IGFBP3,ST3GAL6
Pkc(s)	group		0.084	bias	0.0249	APP,CTSB,IGF2,RGS2
PRKCE	kinase		0.152	bias	0.00273	CDH1,EGR1,PIM1,RGS2
CCN5	growth factor		0.152		0.00505	CDH1,KLF4,PROCR,TGFBR1
SOX11	transcription regulator		0.447	bias	0.0286	DNAJC16,EGR1,IER2,IL6ST,PTH1R,TGFBR1
AR	ligand-dependent nuclear receptor		0.596	bias	0.0293	CDH1,EGR1,IGFBP3,ITGA6,POMT2,PRKCA,SERP1,TACC2,TEAD3
TP53	transcription regulator		0.598		0.021	ACSL3,AKAP12,CDH1,DNMT1,EGR1,FBXW7,GNL3,HSPA4L,IGFBP3,JMJD1C,KSR1,LAMC1,LTBP1,MLF2,NUCKS1,PIM1,PPM1D,PRKCZ,RB1CC1,SMC3,TRIO
OGA	enzyme		0.632		0.00774	CDH1,CDKAL1,DAB2,GNE,IGF2,LAMB1,PIAS1,SERPINE2,TBP,TCF25
BCR (complex)	complex		0.816	bias	0.0345	ATP6V1E1,DDX18,GFPT1,GNL3,KLF4,PIM1,SLC38A1
NPM1	transcription regulator		1	bias	0.001	COL4A1,EGFL7,EGR1,IGF2,IGFBP3,IL6ST,KLF4,SERPINE2,TGFBI
CXCL12	cytokine		1		0.0189	BMP1,CDH1,JMJD1C,SSBP1
PDGF BB	complex		1.013	bias	0.00124	ATP2B1,DAB2,EDN1,EGR1,IER2,PIM1,RGS2
Mek	group		1.124	bias	0.00524	CDH1,DDX21,DNMT1,EGR1,GNL3,IER2,ITGA6,MANSC1
TCR	complex		1.129	bias	0.0225	CARD8,CTSB,LAMP1,NRP1,PIM1,RPL10A,RPL17,RPS23,VDAC3
Growth hormone	group		1.192	bias	0.02	CDH1,IGFBP3,SCARB1,SOD1
TREM1	transmembrane receptor		1.195	bias	0.0327	ACSL3,EDN1,EGR1,SFMBT2,SNUPN,SPP1,TCEAL9
TGFB1	growth factor		1.27	bias	0.002	BMP1,CDH1,COL4A1,EDN1,EGLN1,EZH2,IGFBP3,ITGA6,KLF4,LTBP1,MRC1,NRBP1,NRP1,PRKCA,SCARB1,TGFBI,TGFBR1,TJP2
MAPK1	kinase		1.276		0.0457	CDK19,CTSB,MNS1,SETD2,SMARCC1,SP110,TRIM38
DLX1	transcription regulator		1.342	bias	0.00404	CAP2,CDH1,DAB2,FSTL1,TGFBI
SREBF1	transcription regulator		1.342	bias	0.0336	CAP2,MT-CO3,MT-ND4L,PPCS,RNF14,RPS24
E2F3	transcription regulator		1.342	bias	0.0477	BAIAP2L1,EDN1,IGF2,NUCKS1,PDS5A
ZEB1	transcription regulator		1.989		0.0098	CDH1,EDN1,NRP1,TGFBI
PDLIM2	other	Activated	2		0.0755	CDH1,FSTL1,IGFBP3,NR2F1
MUC1	other	Activated	2.19	bias	0.00467	CDH1,DNMT1,MRC1,NRP1,SMARCC1
HIF1A	transcription regulator	Activated	2.386	bias	0.0441	AKAP12,CDH1,EDN1,EGLN1,FAM13A,FHL2,IGFBP3,NUCKS1,PRKCA
HSF1	transcription regulator	Activated	2.433		0.0141	ATAD2,BCL10,CDH1,DNMT1,HSPA4L,SMC3,SSBP1
Alpha 1 antitrypsin	group				0.0355	CTSB
Steroid 5 alpha-Reductase	group				0.0355	CDH1
CRB2	other				0.0179	APP
Pdgfr	group				0.0355	EGR1
Creb	group				0.032	CTSB,EGR1,GNAS,RGS2
SHP	group				0.0179	EGR1
Nos	group				0.0179	CDH1
RNA polymerase II	complex				0.0368	CAP2,CDH1,IGFBP3,PRLR,RPL10A,ZNF83
Histone h3	group				0.0072	CDH1,EGR1,EZH2,IGFBP3,LARP1B,PRLR,RPL10A,SNUPN,SRRM2,TACC2,TGFBR1
HOTAIR	other				0.0121	CDH1,JAM2,MEG3
Raf	group				0.0438	EGR1,IER2,MANSC1
PKNOX2	transcription regulator				0.0404	CDH1,EGR1
TRIM37	enzyme				0.0161	CD63,DNMT1,EGR1
NADPH oxidase	complex				0.0355	EDN1
ZIC5	transcription regulator				0.0355	CDH1
EIF4A3	enzyme				0.0355	CDH1
LINC01139	other				0.0131	EGR1,IGFBP3
MSI2	other				0.0363	CDH1,TGFBR1
CDC42BPB	kinase				0.0179	CTSB
ENTPD7	enzyme				0.0179	APP
CMTM8	cytokine				0.0179	CDH1
KLF8	transcription regulator				0.0355	CDH1
ZSCAN1	transcription regulator				0.0179	PRKCA
NSRP1	other				0.00308	CDH1,TGFBR1
RTN3	other				0.0179	APP
SLC9A6	transporter				0.0179	APP
TRIM41	enzyme				0.000946	PRKCA,PRKCZ
SGMS1	enzyme				0.0179	APP
ATE1	enzyme				0.0179	CDH1
Histone h4	group				0.0262	PRLR,RPL10A,TACC2,TGFBR1
CALHM1	ion channel				0.0179	APP
ALX1	transcription regulator				0.0179	CDH1
RTN2	other				0.0179	APP
RICTOR	other				0.0446	EGR1,PFKL
ECE	group				0.0179	APP
TSPYL5	other				0.00771	FBXW7,GLDN,PTBP2
BAHD1	other				0.0179	IGF2
TRPC4AP	transporter				0.0179	APP
NAT8	transcription regulator				0.0355	APP
IL33	cytokine				0.0464	KLF4,SCARB1,TJP2
HM13	peptidase				0.0179	APP
HNF1A-AS1	other				0.0446	CDH1,JADE1
HOXD13	transcription regulator				0.00379	LAMC1,SERPINE2,TGFBR1
NSUN6	enzyme				0.0282	CRIM1,DAB2,FSTL1
DUOXA1	other				0.0355	EZH2
NSD2	enzyme				0.0161	JAM2,PDCD10,PRKCA
SBDS	other				0.0182	CEP57,EGR1,PSMD7,PTBP2,SPP1
ZFP57	transcription regulator				0.0179	IGF2
Presenilin	group				0.0179	APP
MAPK8IP3	other				0.0179	APP
IDH2	enzyme				0.0187	CDH1,EGR1
BACE1-AS	other				0.0355	APP
Sfk	group				0.0355	PRLR
SKP2	other				0.0404	CDH1,EZH2
GAB2	other				0.0106	APP,CDH1
GTF2F2	transcription regulator				0.0179	TBP
NR1H3	ligand-dependent nuclear receptor				0.0187	ACSL3,SCARB1
SRF	transcription regulator				0.0218	AKAP12,EGR1,FHL2,IER2,MRPS35
DVL1	other				0.0355	APP
NCOR1	transcription regulator				0.0363	CD82,CDH1
GTF2H1	transcription regulator				0.0355	TBP
EPAS1	transcription regulator				0.0115	AKAP12,EDN1,FAM13A,IGFBP3,PRKCA,SF3A3
PAK4	kinase				0.0187	CDH1,CTSB
SOX4	transcription regulator				0.0109	EZH2,NRP1,PLXNA2
KLC1	other				0.0179	APP
ROCK2	kinase				0.0355	APP
EXOC8	other				0.0179	CDH1
DNMT1	enzyme				0.0367	CDH1,DNMT1,EZH2
ISLR	other				0.00771	FSTL1,TCF25,TEAD3
SLC11A2	transporter				0.0179	APP
CST3	other				0.0355	APP
UBE2E3	enzyme				0.0179	CDH1
GPER1	G-protein coupled receptor				0.0464	EDN1,EGR1,IER2
GGA1	transporter				0.0179	APP
UBA2	enzyme				0.000946	CDH1,EZH2
IDH1	enzyme				0.0287	CDH1,EGR1
FZD7	G-protein coupled receptor				0.0355	CDH1
ADAM10	peptidase				0.00832	APP,IL6ST
F11R	other				0.0179	CDH1
CD33	other				0.0355	APP
MMP9	peptidase				0.0323	CDH1,PIM1,SERPINE2
SP1	transcription regulator				0.000213	CDH1,CREM,EGR1,GNAS,IGF2,IGFBP3,PIM1,PLAA,PRKCA,PRLR,PROCR,PTH1R,SCARB1,SPP1,TGFBR1
DAB2IP	other				0.0131	CDH1,EGR1
SERPINE1	other				0.0187	CDH1,TGFBR1
PNN	other				0.0287	CDH1,SRSF1
mir-148	microRNA				0.0252	CDH1,EGR1
mir-183	microRNA				0.0355	EGR1
mir-181	microRNA				0.0187	ATP2B1,EZH2
mir-625	microRNA				0.0179	IGF2BP1
RTN1	other				0.0179	APP
ARF3	enzyme				0.0179	APP
IQSEC1	other				0.0179	CDH1
BMI1	transcription regulator				0.0168	CD63,DNMT1,FBXW7,MEG3
SPRY4-IT1	other				0.0131	CDH1,ZNF703
RILP	other				0.0355	LAMP1
RBBP9	other				0.0179	CDH1
CNTN1	enzyme				0.0355	CDH1
HBP1	transcription regulator				5.53e-05	CTSB,DNMT1,EZH2
BAZ1A	other				0.0355	IGFBP3
RTN4	other				0.0179	APP
MIR5590	microRNA				0.0355	CDH1
FOXF1	transcription regulator				0.0355	CDH1
PDE4A	enzyme				0.0355	CDH1
YBX1	transcription regulator				0.0455	IGFBP3,KLF4,PFKL,PLXNA2
PLAUR	transmembrane receptor				0.0032	CDH1,CTSB,ITGA6
ETV5	transcription regulator				0.0282	CDH1,KRT23,TJP2
CDC14A	phosphatase				0.0355	CDH1
CBLL1	enzyme				0.0355	CDH1
ATXN1	transcription regulator				0.0179	APP
PHLDA1	other				0.0355	ITGA6
AURKB	kinase				0.049	CD82,PPM1D
NTN1	growth factor				0.0355	CTSB
RNGTT	phosphatase				0.0179	SCARB1
CAV1	transmembrane receptor				0.0109	CDH1,PLAA,TJP2
RAD51AP1	other				5.53e-05	CDH1,ITGA6,KLF4
APBA2	transporter				0.0179	APP
AATF	transcription regulator				0.0179	APP
HDAC6	transcription regulator				0.0147	CDH1,TGFBI,TGFBR1
ITM2B	other				0.0179	APP
MECP2	transcription regulator				0.0302	CDH1,IGFBP3,MRC1
SLC29A1	transporter				0.0363	PPM1D,RPL10A
STIM1	ion channel				0.049	ITGA6,KLF4,TGFBR1
VDR	transcription regulator				0.00771	CSH1/CSH2,IGFBP3,MEG3
SP3	transcription regulator				0.00756	EGR1,IGF2,IGFBP3,PRLR,PROCR,TGFBR1
TAB2	other				0.0355	CD82
PNKP	kinase				0.0355	MT-CO3
IGFBP4	other				0.0355	IGFBP3
ZNF335	transcription regulator				0.0355	REST
AP4E1	other				0.0179	APP
MMP2	peptidase				0.0404	IL6ST,PIAS1
CLN5	other				0.0179	APP
BACE2	peptidase				0.0179	APP
F7	peptidase				0.0109	EGR1,IER2,PAPOLA
MAPK14	kinase				0.0414	CDH1,DAB2,SPP1
BACE1	peptidase				0.0179	APP
TNK1	kinase				0.0179	APP
HNRNPA2B1	other				0.0414	CDH1,MMD,NR2F1,PHACTR2,SRSF1,SULT1A3/SULT1A4
APOE	transporter				0.0136	ADNP,MADD,RPL10A,SRRM2,SULT1A3/SULT1A4
SND1	enzyme				0.0176	CDH1,LTBP1,NR2F1
CSNK2A2	kinase				0.0355	ITGA6
CTBP1	enzyme				0.0363	CDH1,MMD
FGFR2	kinase				0.0287	CDH1,SPP1
GTF2E1	transcription regulator				0.0179	TBP
LEPR	transmembrane receptor				0.0106	CD63,IGFBP3
KLK6	peptidase				0.0355	CDH1
HBEGF	growth factor				0.00187	NRP1,REST
ARRB1	transcription regulator				0.00631	ENAH,SPP1
SLC1A5	transporter				0.0179	SLC38A1
MAD2L2	enzyme				0.00308	CDH1,EGR1
PSMD10	transcription regulator				0.0252	CDH1,GNAS
APOA1	transporter				0.0218	APP,CSH1/CSH2
MPO	enzyme				0.0179	APP
MYB	transcription regulator				0.039	CDH1,EZH2,KLF4
SORL1	transporter				0.0179	APP
AGPS	enzyme				0.0179	LPCAT1
GTF3A	transcription regulator				0.0355	PIM1
ADGRE2	other				0.0262	FSTL1,LTBP1,NUF2
SRRM4	other				0.0179	REST
NR2F2	ligand-dependent nuclear receptor				0.0131	CSH1/CSH2,NRP1
ACSS1	enzyme				0.0179	CDH1
PRNP	other				0.0192	APP,DAB2,IGF2
ATP7A	transporter				0.0355	APP
EPCAM	other				0.0252	EGR1,FHL2
LGALS3	other				0.00232	COL4A1,ITGA6,LAMP1,PRKCZ,SPP1
CDK5	kinase				0.0324	IGFBP3,S100P
DAP3	other				0.0218	MT-CO3,MT-ND4L
MTHFR	enzyme				0.0179	APP
BCAT1	enzyme				0.0179	LAMP1
JADRR	other				0.0179	JADE1
SDCBP	enzyme				0.00516	CDH1,ITGA6,TGFBR1
BIN1	other				0.00631	APP,CDH1
RUNX2	transcription regulator				0.0113	CDH1,EDN1,FRA10AC1,GNAS
BMP7	growth factor				0.00991	BMP1,CDH1,IGF2,IGFBP3,RGS2
FOXO3	transcription regulator				0.029	BCL10,CDH1,EGR1,SOD1
CRP	other				0.00445	CDH1,EGR1,PRKCA
HRAS	enzyme				0.0224	CRIM1,IGF2,ITGA6,PRKCA
PLD2	enzyme				0.0106	PRKCZ,SCARB1
WASF3	other				0.0179	CDH1
ITM2C	other				0.0179	APP
CDK7	kinase				0.0158	OGFOD1,TBP
PTPN3	phosphatase				0.049	TGFBI,TGFBR1
SLC9A3R2	transporter				0.0179	SCARB1
UHRF1	transcription regulator				0.0355	DNMT1
TGFB2	growth factor				0.00168	COL4A1,EGR1,KCNQ1OT1,TGFBR1
GTF2F1	transcription regulator				0.0179	TBP
PICALM	other				0.0179	APP
CREBBP	transcription regulator				0.013	GNAS,PIM1,RGS2,SERPINE2
FURIN	peptidase				0.00832	EGLN1,GNPTG
RPL39	other				0.0179	CDH1
KLHL3	other				0.0355	WNK1
RPLP2	other				0.0355	IGF2BP1
NAT8B	enzyme				0.0355	APP
PODXL	kinase				0.0355	CDH1
SNRPA	other				0.0179	APP
IFITM1	transmembrane receptor				0.0404	PRDM2,SERPINE2
LINC02206	other				0.0179	TGFBR1
AZGP1	transporter				0.0252	CDH1,EGR1
PTGES	enzyme				0.0147	CDH1,EGR1,ITGA6
SNRNP70	other				0.0355	APP
TLR7/8	group				0.0323	EDN1,KCNMA1,RRP7A
HULC	other				0.0218	CDH1,LAMP1
CBFA2T3-GLIS2	fusion gene/product				0.0355	DNMT1
SGPP2	phosphatase				0.0179	CDH1
cytokine	group				0.0355	ITGA6

## Sheet: VLM UpstreamRegulators
Supplemental Table 4c. Upstream regulators identified (n=52) for 34 genes dysregulated in the placenta relative to ventriculomegaly
Upstream Regulator	Molecule Type	Predicted Activation State	Activation z-score	Flags	p-value of overlap	Target Molecules in Dataset
LLGL2		other			0.000864	ITGB2,SGK1
ROR1		kinase			0.000864	ITGB2,SGK1
ERBB3		kinase			0.00106	ITGB2,SGK1
HSF1		transcription regulator			0.00138	HSP90AB1,ITGB3BP,ST13
NSUN6		enzyme			0.00151	ITGB2,SGK1
Par6		group			0.00311	GSK3B
RHOH		enzyme			0.00311	ITGB2
Growth hormone		group			0.00367	DDR1,SGK1
MRTFA		transcription regulator			0.00459	RHOBTB1,SGK1
mir-1180		microRNA			0.00466	GSK3B
MRTFB		transcription regulator			0.00472	RHOBTB1,SGK1
DGCR5		other			0.00621	GSK3B
NFYC		transcription regulator			0.00621	SGK1
HDAC8		transcription regulator			0.00621	GSK3B
GRN		growth factor			0.00755	GPNMB,ITGB2
GABPB1		transcription regulator			0.00775	ITGB2
SUZ12		enzyme			0.00825	CBX6,UBXN7
KMT5B		enzyme			0.0093	SGK1
PPP5C		phosphatase			0.0093	SGK1
PRDM4		transcription regulator			0.0108	ITGB2
ITGAL		transmembrane receptor			0.0124	ITGB2
HDL		complex			0.0139	ITGB2
TENM1		transmembrane receptor			0.0139	GPNMB
APC		enzyme			0.0139	SGK1
NMNAT1		enzyme			0.0154	ATXN10
SNHG20		other			0.017	GSK3B
Focal adhesion kinase		group			0.017	ITGB2
GABPA		transcription regulator			0.017	ITGB2
ANXA1		enzyme			0.0185	ITGB2
FZD4		G-protein coupled receptor			0.0185	GSK3B
LCK		kinase			0.0216	ITGB2
CDK5		kinase			0.0246	FBXO22
NR3C1		ligand-dependent nuclear receptor			0.0249	ARID4B,ITGB2,SGK1
FOXO4		transcription regulator			0.0276	SGK1
RICTOR		other			0.0292	SGK1
mir-486		microRNA			0.0292	ARID4B
MTA1		transcription regulator			0.0292	GSK3B
NR3C2		ligand-dependent nuclear receptor			0.0292	SGK1
ETS2		transcription regulator			0.0307	GSK3B
LEF1		transcription regulator			0.0322	SGK1
EPHA2		kinase			0.0322	SGK1
NAMPT		cytokine			0.0367	ATXN10
A2M		transporter			0.0367	GSK3B
SFN		other			0.0367	SGK1
UPF1		enzyme			0.0397	SGK1
UBE2I		enzyme			0.0397	SGK1
STAT2		transcription regulator			0.0412	ST13
Lh		complex			0.0417	RAB5A,SGK1
TRIM37		enzyme			0.0457	DDR1
ZBED6		transcription regulator			0.0457	SGK1
ZBTB48		transcription regulator			0.0471	GPNMB
IL32		cytokine			0.0471	ITGB2
